# Supplementary material for: Highly heterogeneous-related genes of triple-negative breast cancer: potential diagnostic and prognostic biomarkers
Source: PubMed Central journal article supplement (PMC8165798; doi:10.1186/s12885-021-08318-1), 2021-05-31

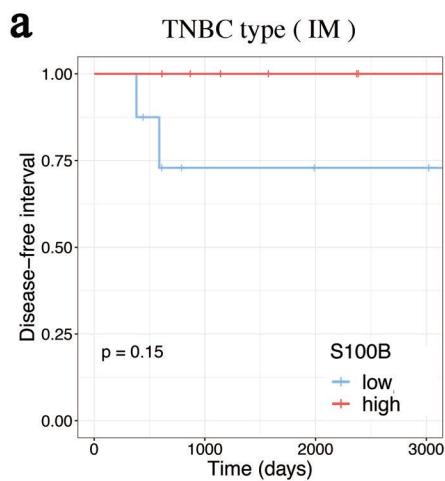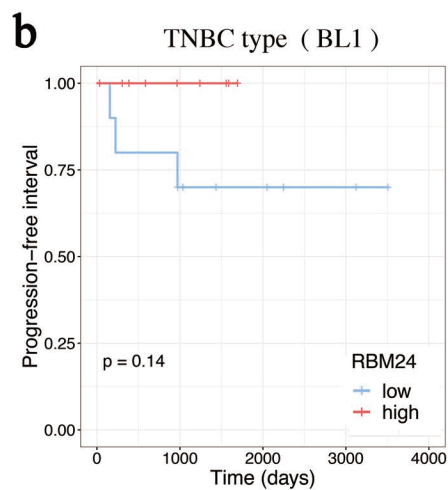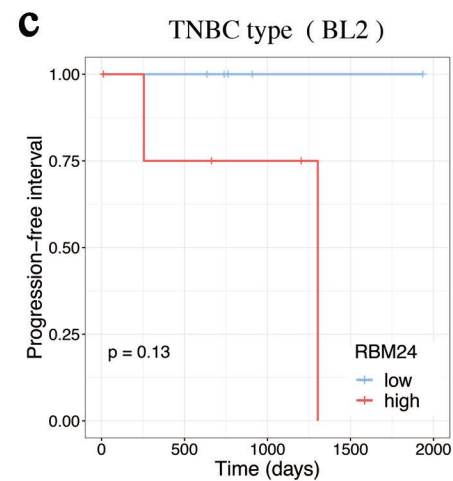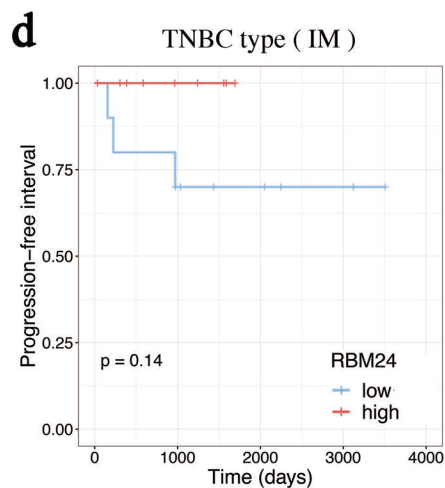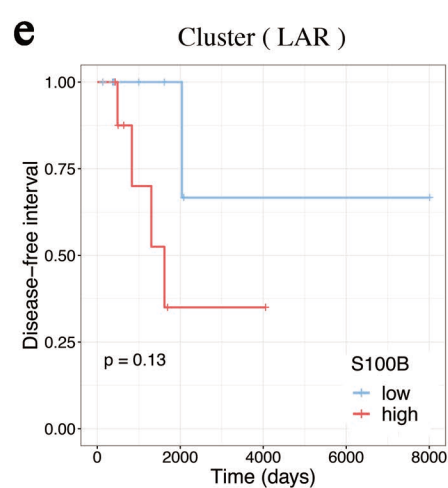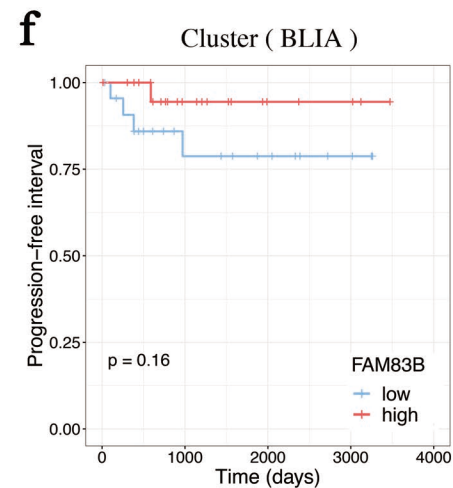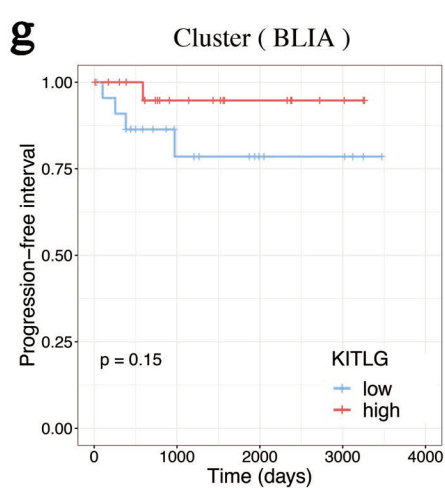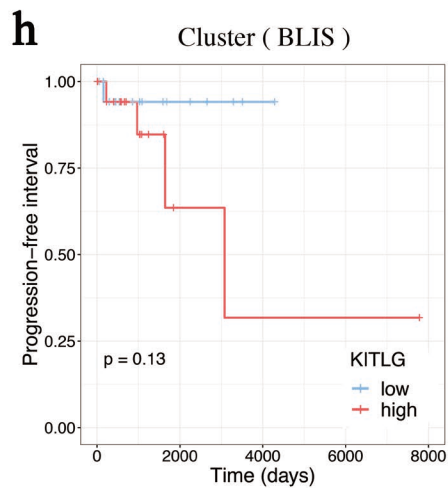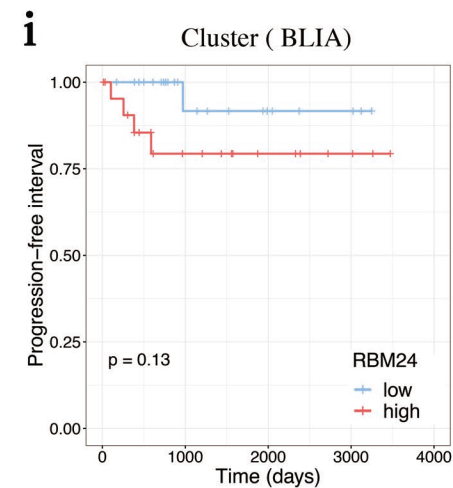

Supplement: 12885_2021_8318_MOESM7_ESM.pdf [file 12885_2021_8318_MOESM7_ESM.pdf]
